# Supplementary material
Source: publisher figshare collection journal article supplement (https://sage.figshare.com/ndownloader/files/18542162)
Supplement: Supplementary file 1 [file 18542162]

## Supplemental Material

**Table S1** Details of relevant fabrics used for thermal protective tests

| Fabrics                         | Fiber content                              | Weave type                       | Weight /g·m <sup>-2</sup> | Thickness/mm |
|---------------------------------|--------------------------------------------|----------------------------------|---------------------------|--------------|
| Outer shell                     | 93% Nomex<br>5% Kevlar<br>2% P140          | Twill                            | 200                       | 0.414        |
| Moisture barrier                | 80% Nomex<br>20% Kevlar<br>PTFE            | Hydroentanglement felt with PTFE | 105                       | 0.453        |
| Thermal liner                   | 80% Nomex<br>20% Kevlar                    | Needle-punched nonwoven          | 120                       | 0.817        |
| Commercial comfort layer        | 50% Nomex<br>50% Viscos                    | Plain                            | 120                       | 0.292        |
| Nanofiber fabric (low density)  | 100% HPCMEs/PMIA<br>nanofiber hollow yarns | Plain                            | 136                       | 0.695        |
| Nanofiber fabric (high density) | 100% HPCMEs/PMIA<br>nanofiber hollow yarns | Plain                            | 155                       | 0.683        |

**Table S2** Comparison of tensile strength between the prepared HPCMEs/PMIA nanofiber hollow yarns with several other reference materials.

| <b>NO.</b> | <b>Materials for testing</b>                                            | <b>Tensile strength/MPa</b> | <b>Ref.</b> |
|------------|-------------------------------------------------------------------------|-----------------------------|-------------|
| 1          | Cellulose acetate/PMIA and cellulose/PMIA composite nanofiber mats      | 16~18                       | 20          |
| 2          | PMIA nanofiber mats reinforced by multi-walled carbon nanotubes (MWNTs) | 14~26                       | 21          |
| 3          | PMIA nanofiber mats treated by hot-stretching                           | 21~33                       | 22          |
| 4          | PMIA nanofiber mats with spider-web-like structure                      | 3.2~26.8                    | 23          |
| 5          | HPCMEs/PMIA nanofiber hollow yarns                                      | 20.3~36.7                   | This work   |

**Table S3** Characteristic phase change parameters of the prepared nanofiber core-sheath and hollow yarns

| Samples                           | Winding Speed | Twisting Speed | DSC Cycle       | Heating Process        |                        |                        |                                             | Cooling Process        |                        |                        |                                             |
|-----------------------------------|---------------|----------------|-----------------|------------------------|------------------------|------------------------|---------------------------------------------|------------------------|------------------------|------------------------|---------------------------------------------|
|                                   |               |                |                 | $T_o/^{\circ}\text{C}$ | $T_p/^{\circ}\text{C}$ | $T_e/^{\circ}\text{C}$ | $\Delta H_m/\text{kJ} \cdot \text{kg}^{-1}$ | $T_o/^{\circ}\text{C}$ | $T_p/^{\circ}\text{C}$ | $T_e/^{\circ}\text{C}$ | $\Delta H_c/\text{kJ} \cdot \text{kg}^{-1}$ |
| <b>HPCMEs/PMIA Fibers (1.5/1)</b> | -             | -              | 2 <sup>nd</sup> | 29.57                  | 37.53                  | 40.14                  | -30.26                                      | 30.71                  | 26.58                  | 16.20                  | 30.35                                       |
| <b>Untreated Core-sheath Yarn</b> | 1.2           | 200            | 2 <sup>nd</sup> | 29.85                  | 36.53                  | 39.58                  | -15.18                                      | 29.50                  | 25.21                  | 20.59                  | 17.60                                       |
|                                   | 1.0           | 200            | 2 <sup>nd</sup> | 31.48                  | 36.92                  | 39.57                  | -22.54                                      | 29.59                  | 25.84                  | 19.65                  | 24.41                                       |
|                                   | 1.2           | 200            | 2 <sup>nd</sup> | 30.93                  | 37.16                  | 39.69                  | -21.77                                      | 29.94                  | 26.20                  | 18.21                  | 24.27                                       |
|                                   | 1.2           | 200            | 1 <sup>st</sup> | 31.93                  | 35.27                  | 40.17                  | -23.64                                      | 29.94                  | 26.17                  | 19.38                  | 24.85                                       |
|                                   | 1.4           | 200            | 2 <sup>nd</sup> | 31.61                  | 36.75                  | 39.44                  | -24.31                                      | 29.81                  | 26.02                  | 19.23                  | 24.47                                       |
|                                   | 1.6           | 200            | 2 <sup>nd</sup> | 30.91                  | 36.84                  | 39.52                  | -25.07                                      | 30.11                  | 26.64                  | 20.00                  | 18.70                                       |
|                                   | 1.8           | 200            | 2 <sup>nd</sup> | 31.67                  | 37.68                  | 40.40                  | -24.01                                      | 29.74                  | 25.95                  | 17.13                  | 24.52                                       |
|                                   | 2.0           | 200            | 2 <sup>nd</sup> | 30.78                  | 37.15                  | 39.68                  | -28.54                                      | 30.24                  | 26.70                  | 18.52                  | 29.23                                       |
|                                   | 1.2           | 150            | 2 <sup>nd</sup> | 33.15                  | 37.25                  | 39.71                  | -23.91                                      | 30.37                  | 26.80                  | 19.48                  | 24.08                                       |
|                                   | 1.2           | 230            | 2 <sup>nd</sup> | 32.60                  | 37.05                  | 39.87                  | -22.40                                      | 30.35                  | 26.43                  | 20.58                  | 20.68                                       |
| <b>Nanofiber Hollow Yarns</b>     | 1.2           | 260            | 2 <sup>nd</sup> | 30.78                  | 37.21                  | 39.64                  | -22.32                                      | 29.94                  | 26.31                  | 19.99                  | 23.82                                       |
|                                   | 1.2           | 300            | 2 <sup>nd</sup> | 29.88                  | 37.33                  | 39.85                  | -23.18                                      | 30.19                  | 26.40                  | 19.98                  | 23.61                                       |

**Table S4** Thermal storage properties of the prepared hollow yarns vs. several relevant samples.

| NO. | PCMs          | $\Delta H_m$ of PCMs<br>/kJ·kg <sup>-1</sup> | Supporting Materials                                                                                                                                                                                                                              | Useful Products     | $\Delta H_m$ of the Products<br>/kJ·kg <sup>-1</sup> | Ref. (year)   |
|-----|---------------|----------------------------------------------|---------------------------------------------------------------------------------------------------------------------------------------------------------------------------------------------------------------------------------------------------|---------------------|------------------------------------------------------|---------------|
| 1   | Microcapsules | 54.8                                         | Polyester fabric                                                                                                                                                                                                                                  | Coated fabrics      | 0.30~5.70                                            | 28 (2002)     |
| 2   | Microcapsules | 134.3                                        | Polyester fabric                                                                                                                                                                                                                                  | Impregnated fabrics | 0.91~4.44                                            | 29 (2005)     |
| 3   | Microcapsules | 117.6                                        | Nylon fabric                                                                                                                                                                                                                                      | Coated fabrics      | 5.38~6.83                                            | 30 (2008)     |
| 4   | Paraffin      | 115                                          | PVA                                                                                                                                                                                                                                               | Wet-spun fibers     | 15.35~25.01                                          | 31 (2008)     |
| 5   | Paraffin      | 108                                          | PVA                                                                                                                                                                                                                                               | Wet-spun fibers     | 22.1~23.7                                            | 32 (2008)     |
| 6   | Microcapsules | 104.7                                        | Cotton fabric                                                                                                                                                                                                                                     | Coated fabrics      | 0.92~7.6                                             | 33 (2010)     |
| 7   | Microcapsules | 75.66                                        | Several fabrics including:<br>[82% Polyester, 18% Polyurethane]<br>[11% Elastane, 35% Polyamide, 54% Polyester]<br>[100% Polyamide]<br>[100% Polyester coating with 100% PVC]<br>[40% Polyester, 60% Cotton]<br>[100% Polyamide]<br>[100% Cotton] | Coated textiles     | 11.1~19.4                                            | 34 (2012)     |
| 8   | Microcapsules | 164.6                                        | PA6                                                                                                                                                                                                                                               | Electrospun yarns   | 0.46~4.29                                            | 35 (2016)     |
| 9   | Microcapsules | -                                            | Acrylic                                                                                                                                                                                                                                           | Wet-spun fibers     | 4.6                                                  | 36 (2013)     |
| 10  | HPCMEs        | 76.56                                        | PMIA/PVA                                                                                                                                                                                                                                          | Electrospun yarns   | 15.18~28.54                                          | Present study |

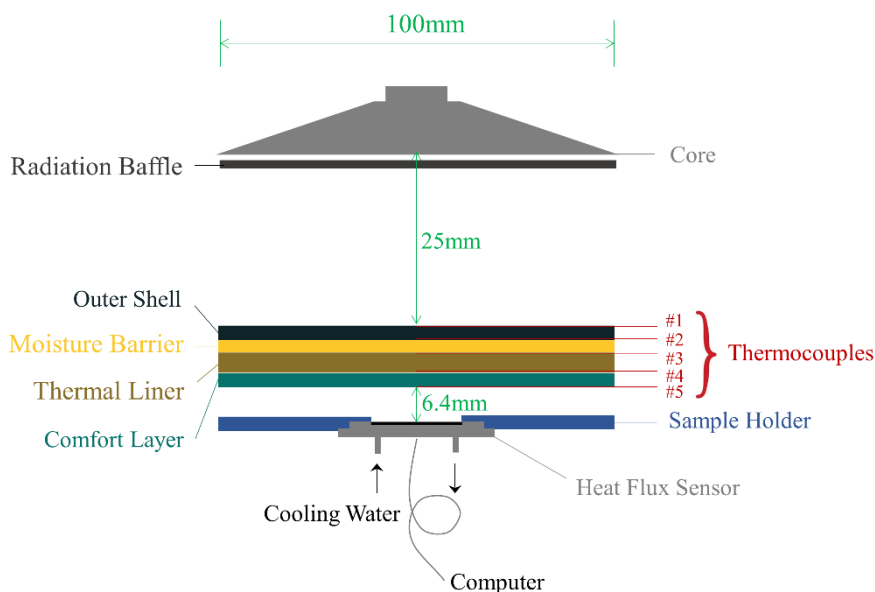

**Fig. S1** Platform for thermal protective test.

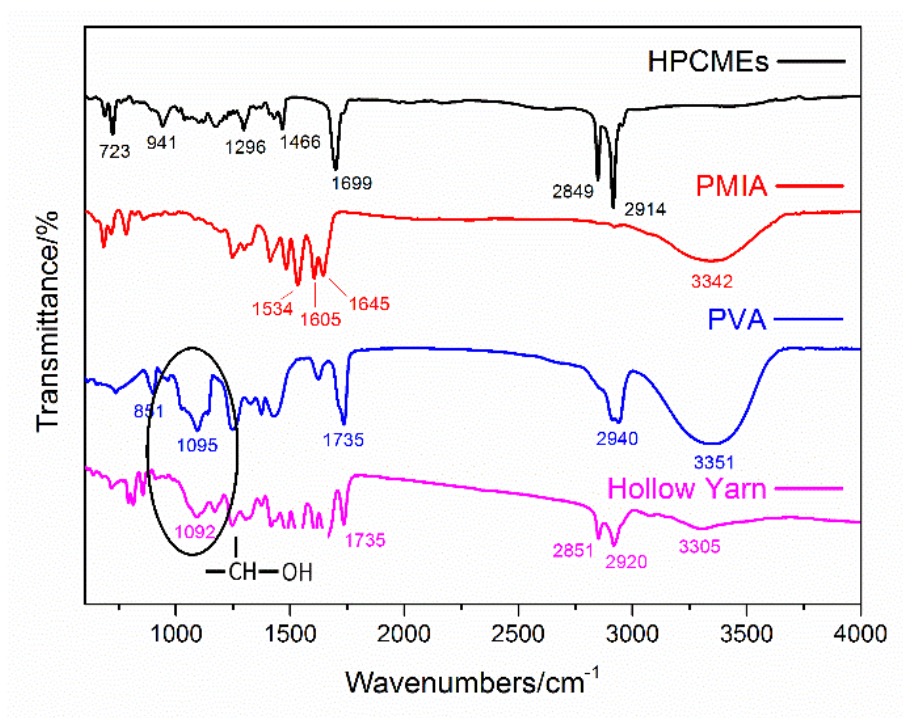

**Fig. S2** FTIR spectra of HPCMEs, PMIA, PVA and the prepared hollow yarn.

For pure PMIA, PVA and the prepared hollow yarns, absorption peaks at  $\sim 3350\text{ cm}^{-1}$  result from the strong intermolecular and intramolecular bonds of hydroxyl groups. The peaks around  $2900\text{ cm}^{-1}$  is assigned to C-H stretching vibrations from alkyl groups, while the strong absorbance centered at  $\sim 1700\text{ cm}^{-1}$  corresponding to the stretching vibration of carbonyl (C=O) groups. Another important absorption peak for PVA verified at the frequency of  $1095\text{ cm}^{-1}$  is known to be the vibrational band of tertiary hydroxyl groups. In the present study, its appearance can be considered as the existence

of PVA. As the obtained hollow yarns also show obvious characteristic peak at  $1092\text{ cm}^{-1}$ , it can be concluded that there is still plenty of PVA remained even after the water treatment process.

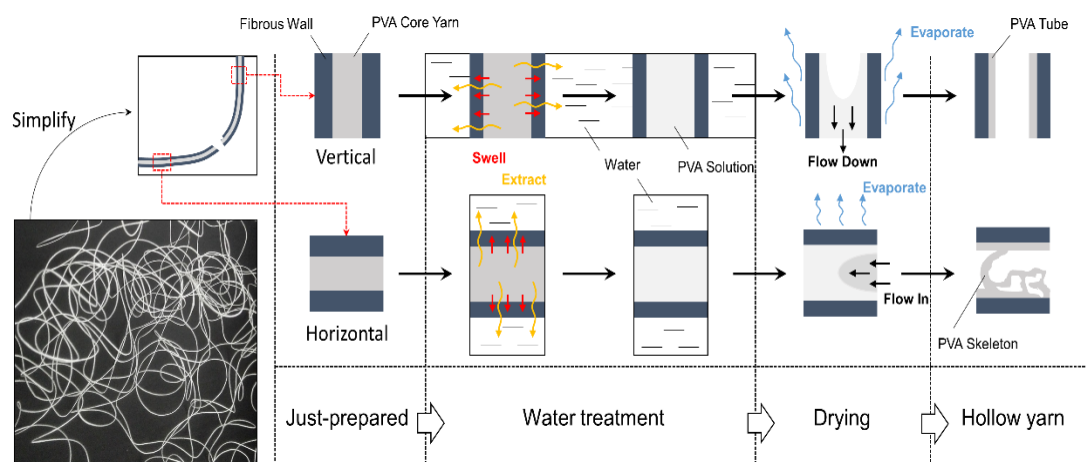

**Fig. S3** Formation mechanism of uneven PVA distribution in one single hollow yarn.

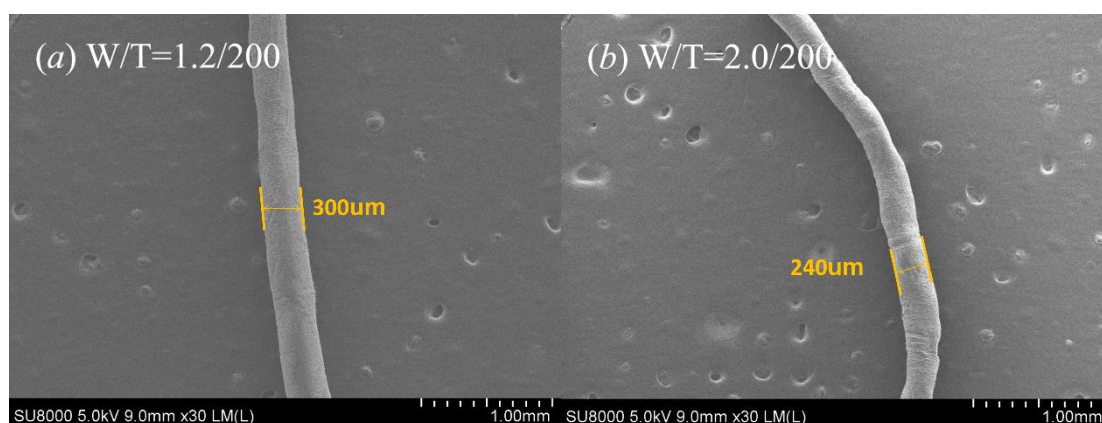

**Fig. S4** SEM images of the nanofiber hollow yarns prepared under W/T of (a) 1.2/200 and (b) 2.0/200.

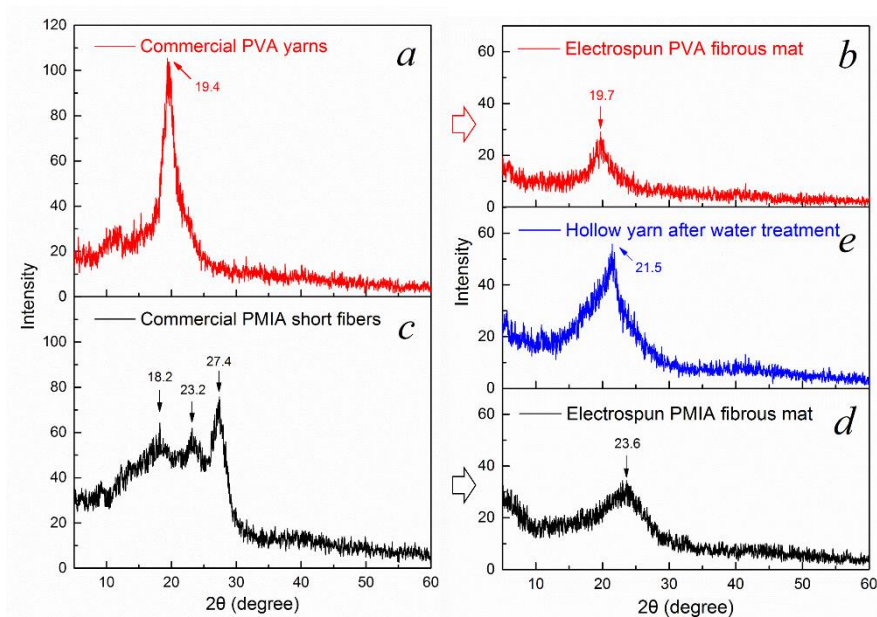

**Fig. S5** XRD patterns of (a) commercial PVA yarns, (b) electrospun PVA fibrous mat, (c) commercial PMIA short fibers, (d) electrospun PMIA fibrous mat and (e) hollow yarns after water treatment.

It is apparent that the commercial PVA yarns are highly crystallized and show a sharp diffraction peak at the scattering angle of  $19.4^\circ$ . The PMIA short fibers prepared by intensive drawing at high temperatures also show three main diffraction peaks at  $18.2^\circ$ ,  $23.2^\circ$  and  $27.4^\circ$ , respectively. By fabricating them into electrospun fibrous mats, however, their perfect crystal structure is destroyed. Their diffraction peaks therefore become flat, indicating amorphous structure or a phase between amorphous and highly crystallized structure.

Compared with above fibrous mats, the peak intensity of the prepared hollow yarns is a little bit stronger and sharper, which implies an increase of polymeric crystallinity. This may due to the stretching of PMIA ultrafine fibers during yarn fabrication. The stretching effect of ultrafine fibers resulting from the twister's rapid rotation is considered to be helpful for increasing the formation of some additional crystalline order and improving the degree of molecular orientation.

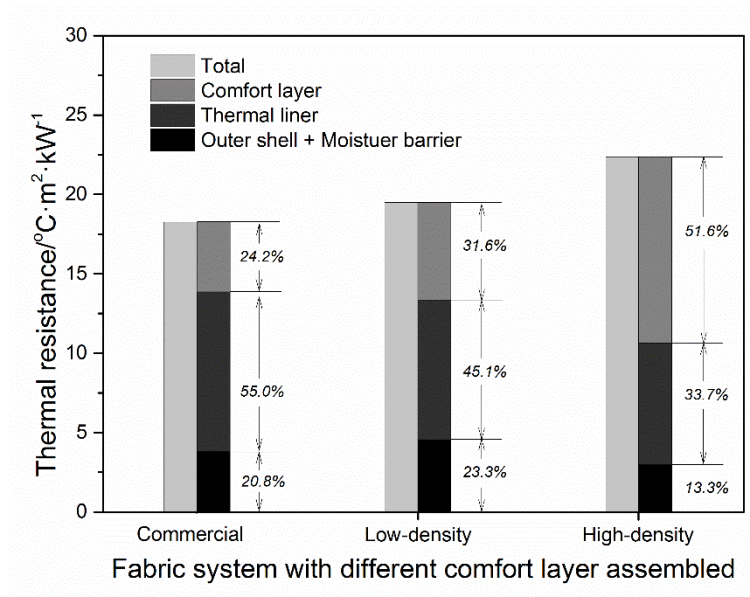

**Fig. S6** Thermal resistance values for multilayered protective fabric systems with different comfort layer assembled.

“Commercial”, “Low-density” and “High-density” in this figure are short for corresponding fabric systems with commercial comfort layer, nanofiber fabric (low density) and nanofiber fabric (high density) assembled, respectively. It is obvious that the protective fabric systems with nanofiber hollow yarn fabrics assembled have larger resistance values, which means that these fabrics possess better thermal insulation performance. Take the High-density system for example, it is about 22.4% higher than that of the commercial one. The proportion of comfort layer in their total thermal insulation is also greatly improved. That is, the nanofiber comfort layer plays a more important role in thermal protection.
